# Supplementary material for: A brand new zeolite catalyst for carbonylation reaction
Source: Royal Society of Chemistry journal article supplement (doi:10.1039/c8cc08411d), 2018-12-22
Supplement: c8cc08411d1.pdf [file c8cc08411d1.pdf]

Electronic Supplementary Material (ESI) for ChemComm.  
This journal is © The Royal Society of Chemistry 2018

## Electronic Supplementary Information (ESI)

### **A brand new zeolite catalyst for carbonylation reaction**

Xiaobo Feng,<sup>a</sup> Jie Yao,<sup>a</sup> Hangjie Li,<sup>a</sup> Yuan Fang,<sup>a</sup> Yoshiharu Yoneyama,<sup>a</sup> Guohui Yang<sup>\*ab</sup> and Noritatsu Tsubaki<sup>\*a</sup>

<sup>a</sup> Department of Applied Chemistry, School of Engineering, University of Toyama, Gofuku 3190, Toyama 930-8555, Japan

<sup>b</sup> State key Laboratory of Coal Conversion, Institute of Coal Chemistry, Chinese Academy of Sciences, Taiyuan 030001, PR China

E-mail address: [tsubaki@eng.u-toyama.ac.jp](mailto:tsubaki@eng.u-toyama.ac.jp) (N. Tsubaki)

E-mail address: [thomas@eng.u-toyama.ac.jp](mailto:thomas@eng.u-toyama.ac.jp) (G. Yang).

## **Table of Contents**

1. Catalyst preparation
2. Catalyst characterization
3. Catalytic testing
4. Analysis of the spent HEU-12 zeolite
5. In situ DRIFT spectroscopy study
6. Supplementary Figures and Table

## 1. Catalyst preparation

The reagents used for EU-12 zeolite synthesis included aluminum hydroxide ( $\text{Al}(\text{OH})_3 \cdot 1.0 \text{H}_2\text{O}$ , Aldrich), rubidium hydroxide ( $\text{RbOH}$ , 50 wt% aqueous solution, Aldrich), colloidal silica (Ludox AS-30, 30 wt%, Aldrich) and Choline chloride ( $\text{ChCl}$ , 99 wt%, Wako), sodium hydroxide ( $\text{NaOH}$ , 99 wt% Wako). The final composition of the synthesis mixture was 2.0 $\text{ChCl}$ : 0.3 $\text{Rb}_2\text{O}$ : 0.7 $\text{Na}_2\text{O}$ : 0.25 $\text{Al}_2\text{O}_3$ : 5 $\text{SiO}_2$ : 100 $\text{H}_2\text{O}$ . In a typical run,  $\text{Al}(\text{OH})_3$  and  $\text{RbOH}$  were slowly added into distilled water with magnetic stirring to prepare an aluminate solution. Then a mixture of colloidal silica,  $\text{ChCl}$  and water was added into the prepared aluminate solution and was kept stirring for 24 h. Finally, the synthesis mixture was subjected to a hydrothermal treatment at 150 °C under 5 rpm rotation for 7 days. The resultant product was filtered, washed repeatedly with deionized water, and dried overnight at 100 °C. As-synthesized zeolite was calcined under air atmosphere at 600 °C for 6 h to remove the organic structure-direction agent (OSDA), as made EU-12. The calcined sample was then exchanged three times in 1.0 M ammonium nitrate ( $\text{NH}_4\text{NO}_3$ , 99 wt%, Wako) solution at 80 °C for 6 h followed by drying at 110 °C overnight and calcination at 550 °C for 4 h in order to obtain its proton ( $\text{H}^+$ ) form, which denoted as HEU-12.

For comparison purpose, we performed DME carbonylation reaction on commercial HMOR (12-MR: 6.5×7.0, 8-MR: 2.6×5.7 Å;  $\text{SiO}_2/\text{Al}_2\text{O}_3=18$ ) and HZSM-35 (10-MR: 4.2×5.4, 8-MR: 3.5×4.8 Å;  $\text{SiO}_2/\text{Al}_2\text{O}_3 =18$ ) zeolite under the same conditions to HEU-12. In addition, H-Beta (12-MR: 6.6×6.7, 5.6×5.6 Å;  $\text{SiO}_2/\text{Al}_2\text{O}_3=18$ ), HZMS-5 (10-MR: 5.1×5.5, 5.3×5.6 Å;  $\text{SiO}_2/\text{Al}_2\text{O}_3=24$ ) and HY (12-MR: 7.4×7.4 Å  $\text{SiO}_2/\text{Al}_2\text{O}_3=15$ ) were also chosen to study their DME carbonylation performance under the same reaction conditions to HEU-12. All of the samples were purchased from Tosoh Catalyst Plant (Tosoh CO., Tokyo, Japan).

The Cu/EU-12 (0.8 wt% Cu, measured by XRF) zeolite was prepared by ion-exchange method. First, 0.02 mol/L  $\text{Cu}(\text{NO}_3)$  solution was prepared, and EU-12 was added to this solution to form a suspension. After stirred at 80 °C for 8 h, it was filtered, washed with excess deionized water, and then dried at 100 °C overnight. The final sample was calcined at 500 °C for 5 h in air. Before reaction, the Cu/EU-12

sample was reduced at 300 °C for 4 h in H<sub>2</sub> atmosphere

The produce of regeneration spent EU-12 zeolite was referred the method reported by Lucas et al.<sup>1</sup> The spent EU-12 zeolite after reaction for 50 h was calcined at 200 °C for 1 h under air atmosphere, then heated to 500 °C and maintained for 2 h, and finally heated to 700 °C for 0.5 h.

## 2. Catalyst characterization

Powder X-ray diffraction (XRD) pattern of the HEU-12 zeolite was recorded on a Rigaku D/max-2550V diffractometer by employing Cu<sub>kα</sub> radiation ( $\lambda=1.54056 \text{ \AA}$ ) at room temperature. Data points were acquired by scanning at a rate of  $0.02^\circ \text{ s}^{-1}$  from  $2\theta= 5^\circ$  to  $2\theta= 50^\circ$ . The surface morphology and average size of HEU-12 zeolite were observed using a scanning electron microscope (SEM, JEOL JSM-6360LV). NH<sub>3</sub> temperature-programmed desorption (NH<sub>3</sub>-TPD) was performed by using a BELCAT-B-TT catalyst analyzer (BEL Japan CO. Ltd.) equipped with a thermal conductivity detector (TCD) to characterize the acidic property of zeolite. In a typical procedure, 40 mg of sample was pretreated in flowing helium gas (He, 30 mL min<sup>-1</sup>) at 500 °C for 1 h and then cooled down to 100 °C. At this temperature, the sample was purged with He for 30 min and then 5% NH<sub>3</sub> in Ar passed over the sample for 30 min. The treated sample was subsequently purged by He at the same temperature for 30 min to remove physically adsorbed NH<sub>3</sub>. TPD was performed in flowing He (30 mL min<sup>-1</sup>) from 100 to 800 °C with a heating rate of 10 °C min<sup>-1</sup>. Thermogravimetric (TG) analysis of the fresh EU-12 sample without calcination was performed on a Shimadzu DTG-60 thermal analyzer. In a typical TG measurement, the temperature was heated from room temperature to 900 °C with a ramping rate of 10 °C min<sup>-1</sup> under air atmosphere. Nitrogen absorption/desorption isotherms were measured at -196 °C using Micromeritics 3Flex analyzer. Prior to measurement, the samples were degassed at 200 °C under vacuum for 4 h. The total surface area was calculated using the Brunauer-Emmett-Teller (BET) method; the pore volume was obtained from the Horvath-Kawazoe (HK) equation; the micropore volume and external surface area were calculated by employing the t-plot method. The Si/Al molar ratio of HEU-12 zeolite was confirmed by energy dispersive X-ray fluorescence (XRF) spectrometry

(PHILIPS, PW2404R). The  $^{27}\text{Al}$  and  $^{29}\text{Si}$  Solid-state magic angle spinning (MAS) NMR spectra were carried out on JEOL JNM-ECX500 spectrometer.

### 3. Catalytic testing

The catalytic performance valuation of HEU-12 zeolite was conducted in a packed-bed stainless steel reactor (9.5 mm outside diameter) heated by an external heater. The prepared catalyst was sieved into 20-40 mesh. In a typical run, 0.5 g zeolite was loaded into the reactor. Prior to reaction, catalyst was heated to 500 °C and kept for 3 h to remove impurity and adsorbed water under  $\text{N}_2$  flowing. Then, the feedstock gas consisting of 3.03% Ar/4.13% DME/92.84% CO with 1.5 MPa was introduced into reactor at 20 mL/min. The effluent gas was analyzed by an online gas chromatograph (GC) equipped with TCD (Porapak Q column for DME and Activated carbon column for Ar, CO,  $\text{CO}_2$  and  $\text{CH}_4$ ), while the methyl acetate (MA) and methanol (MeOH) in off-gas were collected by ice trap using 1-butanol as solvent. The liquid products were analyzed by another Shimadzu 2014-8A equipped with a flame-ionization detector (FID) with a Gaskuropack 54 column. Internal standard quantitation method was used to determine the amount of MA and MeOH with 1-propanol as internal standard. All of the products selectivity in this report was calculated with molecular base. DME conversions ( $C_{\text{DME}}$ ) as well as products selectivity ( $S_{\text{MA}}$ ,  $S_{\text{MeOH}}$ ,  $S_{\text{CH}_4}$  and  $S_{\text{CO}_2}$ ) were calculated by the following equations:

$$C_{\text{DME}} = (X_{\text{DME, in}}/X_{\text{Ar, in}} - X_{\text{DME, out}}/X_{\text{Ar, out}}) / (X_{\text{DME, in}}/X_{\text{Ar, in}}) \times 100\%$$

$$S_{\text{MA}} = [\text{MA}] / ([\text{MA}] + [\text{Methanol}] + [\text{CH}_4] + [\text{CO}_2])$$

$$S_{\text{MeOH}} = [\text{Methanol}] / ([\text{MA}] + [\text{Methanol}] + [\text{CH}_4] + [\text{CO}_2])$$

$$S_{\text{CO}_2} = [\text{CO}_2] / ([\text{MA}] + [\text{Methanol}] + [\text{CH}_4] + [\text{CO}_2])$$

$$S_{\text{CH}_4} = [\text{CH}_4] / ([\text{MA}] + [\text{Methanol}] + [\text{CH}_4] + [\text{CO}_2])$$

( $X_{\text{DME, in}}$ : mole fraction of DME in feed gas;  $X_{\text{DME, out}}$ : mole fraction of DME in exit gas;  $X_{\text{Ar, in}}$ : mole fraction of Ar in feed gas;  $X_{\text{Ar, out}}$ : mole fraction of Ar in exit gas; “[MA]”, “[Methanol]”, “[ $\text{CH}_4$ ]” and “[ $\text{CO}_2$ ]” stand for the amounts in products.)

### 4. Analysis of the spent HEU-12 zeolite

The coke-deposited sample was obtained after the DME carbonylation reaction at 220 °C for time on stream (TOS) of 50 h. The amount and location of the deposited

carbon in the spent HEU-12 were investigated by both quantitative and qualitative methods. For the quantitative analysis, the total coke weight was determined by TG analysis, assuming that the weight loss above 200 °C of the spent HEU-12 zeolite was entirely due to coke combustion. The location of coke on the spent HEU-12 zeolite was determined by N<sub>2</sub> adsorption-desorption isotherm. The amount of internal coke in the zeolite micropores was calculated from the decrease in the micropore volume of the spent HEU-12 sample, as compared with the pristine HEU-12 sample. In this calculation method, we assumed that the coke density was 1.22 g · cm<sup>-3</sup>. The amount of external coke (coke deposited on the external surface) was calculated by subtracting the internal coke content from the total coke content and based on the assumption that the remaining micropores volume in the spent catalyst was fully accessible to N<sub>2</sub> molecules through the three dimensionally interconnected zeolite channels. The coke analysis method was reported by Ryoo et al.<sup>2</sup>

To reveal the nature of coke retained on spent zeolite, the soluble components of coke were determined by gas chromatographs-mass spectrometer (GC-MS) according to the method reported by Guisnet and Magnoux.<sup>3</sup> In this technique, 50 mg sample of spent zeolite was treated with 2 mL of HF acid (40%) in order to dissolve the zeolite and liberate the coke. 14 mL of dichloromethane (CH<sub>2</sub>Cl<sub>2</sub>) were added in order to recover the soluble coke compounds. Finally, the coke molecules soluble in CH<sub>2</sub>Cl<sub>2</sub> was analyzed by GC-MS (Shimadzu, GCMS-TQ8050) equipped with a capillary HP-5MS column. Compounds were identified by comparing mass spectra with NIST 11 library data.

## 5. In situ DRIFT spectroscopy study

In situ diffuse reflectance infrared Fourier transform (DRIFT) spectroscopy was performed on a Nicolet Nexus 470 FTIR spectrometer equipped with a diffuse reflectance attachment and with a MCT detector. The catalyst powder weighing about 20 mg was placed in a diffuse reflectance infrared cell with a ZnSe window. The spectra were recorded by collecting 32 scans at 2 cm<sup>-1</sup> resolution. Prior to adsorption, the HEU-12 sample was dehydrated under He atmosphere at 300 °C for 2 h. In a typical experiment, the temperature was reduced to the reaction temperature after

pretreatment and the background spectrum was recorded prior to introduction of DME into the cell at ambient pressure. After the steady state was obtained, He was introduced to remove DME and the adsorbed groups. CO was then introduced for 30 min, followed by purging with He. Then the 3.03% Ar/4.13% DME/92.84% CO as reactant gas was introduced with the flow rate of 20 mL/min. Once the steady state was reached, He was flowed into the cell again.

## 6. Supplementary Figures and Table

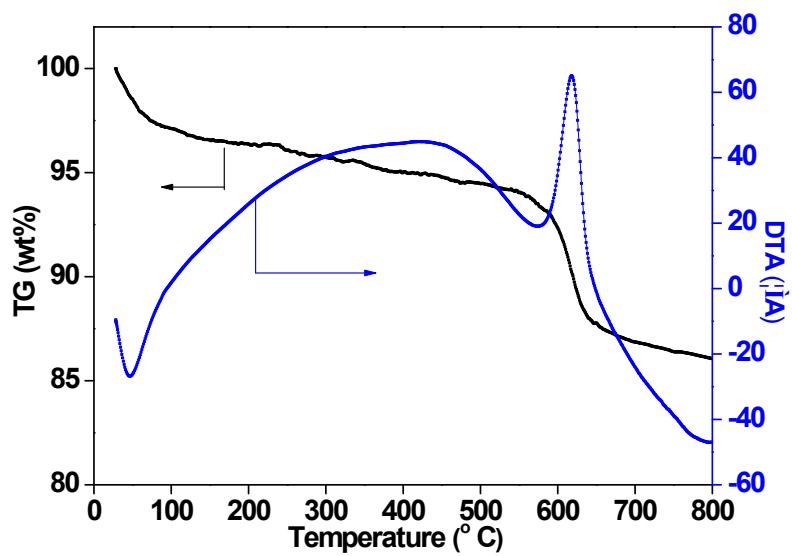

Fig. S1 TG/DTA curves of the fresh EU-12 sample without calcination.



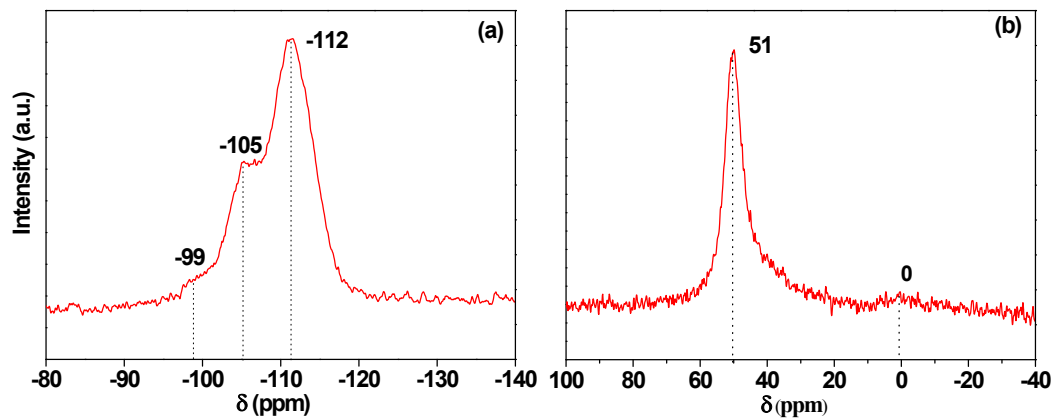

Fig. S2 (a)  $^{29}\text{Si}$  MAS NMR and (b)  $^{27}\text{Al}$  MAS NMR spectra of HEU-12 zeolite

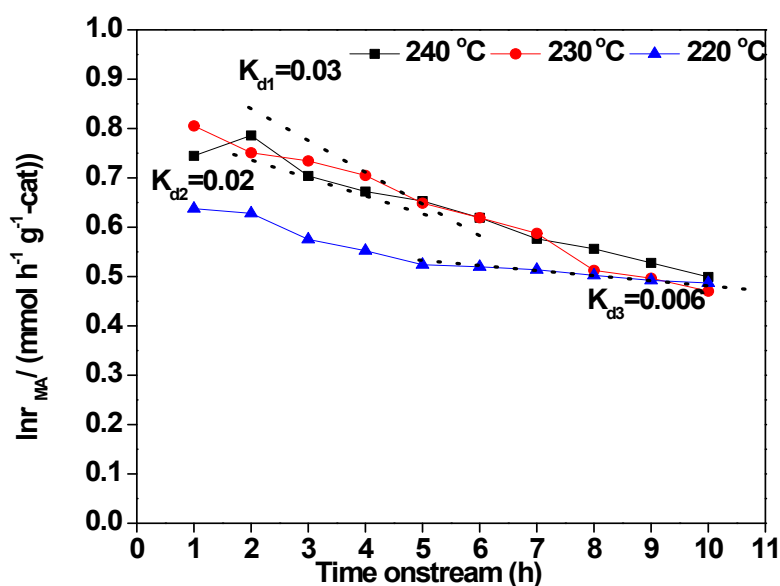

Fig. S3 Deactivation patterns on HEU-12 zeolite at 240 °C, 230 °C and 220 °C during DME carbonylation. Reaction condition: P=1.5 MPa, feed gas: 3.03% Ar/4.13% DME/92.84% CO, flow rate = 20 mL/min, weight<sub>(zeolite)</sub> = 0.5 g.

Fig. S3 compares the deactivation rate constants ( $k_d$ ) of DME carbonylation on HEU-12 zeolite at 220-240 °C. The rate constants were designated as  $K_{d1}$ ,  $K_{d2}$  and  $K_{d3}$  corresponding to the reaction temperature of 240, 230 and 220 °C, respectively. The  $K_d$  values were derived from the production rates of MA using the power-law equation.<sup>4,5</sup>

$$-r_d = -d\alpha / dt = k_d \alpha^a$$

The  $r_d$  is the deactivation rate,  $\alpha$  is the relative activity of the catalyst at time  $t$  (h), and  $a$  is the order of deactivation.<sup>4</sup> At 240 °C, the fast deactivation rate constant,  $k_{d1}$  was  $0.03 \text{ h}^{-1}$ , whereas  $k_{d3}$  was only  $0.006 \text{ h}^{-1}$  at 220 °C.

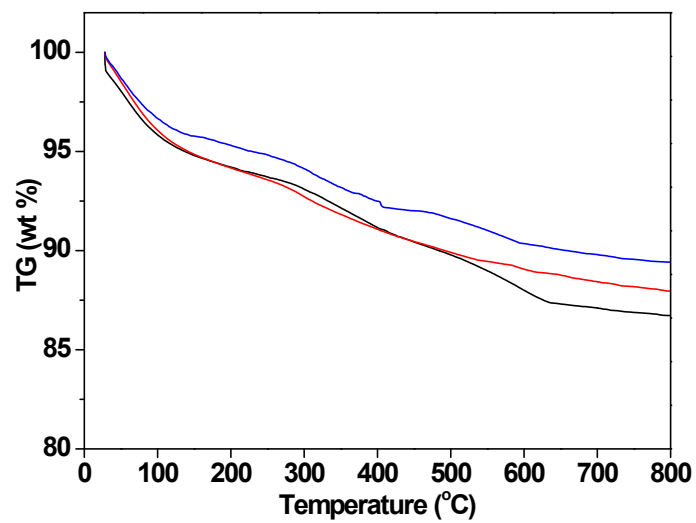

Fig. S4 The TG curves of the spent HEU-12 zeolite after reaction at 220 °C (blue line), 230 °C (red line) and 240 °C (black line).

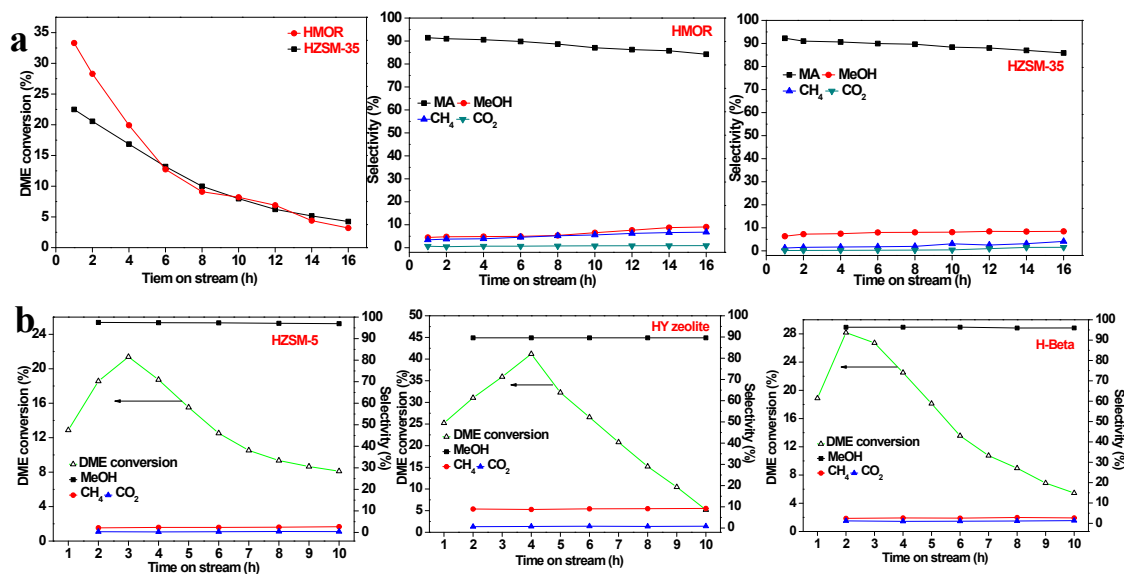

Fig. S5 (a) DME carbonylation performance over HMOR and H-ZSM-35 zeolite; (b) DME carbonylation performance over HZSM-5, HY, and H-Beta zeolite; reaction condition: T=220 °C, P=1.5 MPa, feed gas: 3.03% Ar/4.13% DME/92.84% CO, flow rate= 20 mL/min, Weight<sub>(zeolite)</sub>=0.5 g, MeOH=methanol.

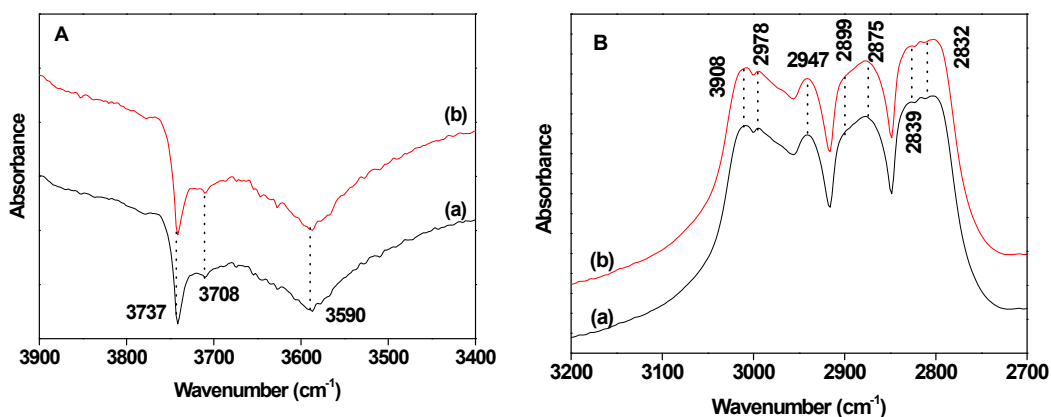

Fig. S6 In situ DRIFT spectra in O-H and C-H regions of DME adsorption over HEU-12 for (a) 5 min and (b) 10 min at 220 °C (A: O-H region, B: C-H region).

Three negative bands at 3737, 3708 and 3590  $\text{cm}^{-1}$  were induced after exposure to DME gaseous. Generally, the band at 3590  $\text{cm}^{-1}$  is attributed to DME interaction with the Brønsted acid sites in 8-MR channels. The bands at 3708 and 3737  $\text{cm}^{-1}$  are associated with the AlOH and the internal and terminal or external SiOH groups, respectively.<sup>7</sup> A series of broad peaks are observed in the range of 2700-3100  $\text{cm}^{-1}$ , which is attributed to the symmetric and asymmetric C-H stretching of methyl, indicating the generating of methoxyl species by DME reaction with the Brønsted acidic sites.<sup>8</sup>

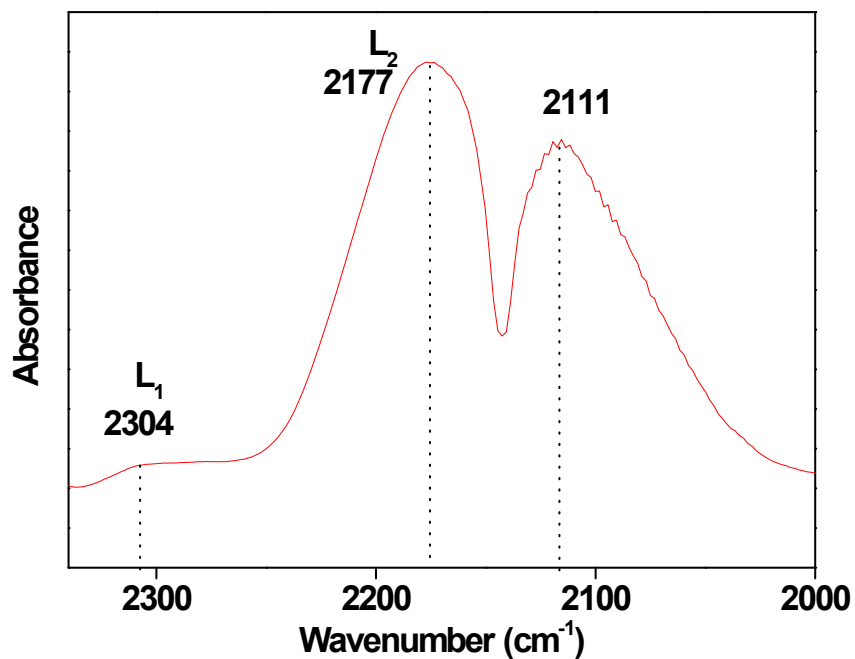

Fig. S7 In situ DRIFT spectrum over HEU-12 zeolite with adsorbed CO at 220 °C.

The weak  $L_1$  ( $2304\text{ cm}^{-1}$ ) band is attributed to CO on strong Lewis acid sites (e.g., extra-framework  $\text{Al}^{3+}$ ) and  $L_2$  ( $2177\text{ cm}^{-1}$ ) sites correspond to penta-coordinated  $\text{Al}^{3+}$  site while the peak at  $2111\text{ cm}^{-1}$  is assigned to CO interested with acidic O-H groups via H-bonding.<sup>9</sup>

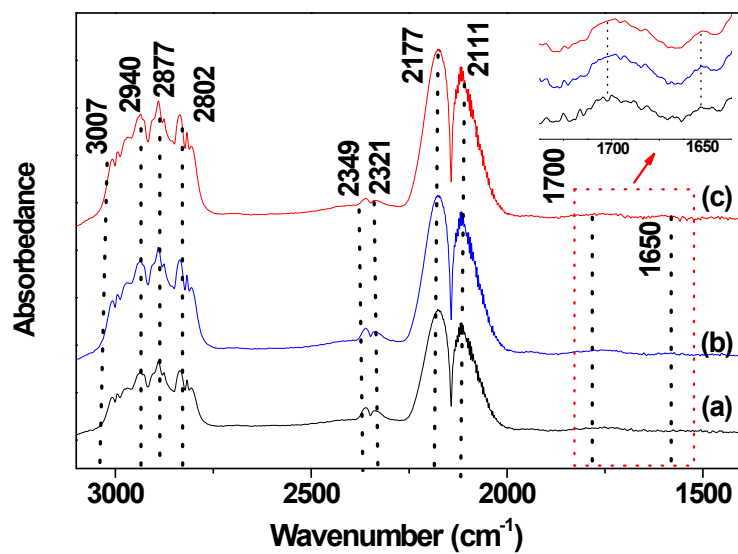

Fig. S8 In situ DRIFT spectra over HEU-12 zeolite after exposure to DME/CO/Ar for (a) 2 min, (b) 5 min and (c) 10 min at 230 °C.

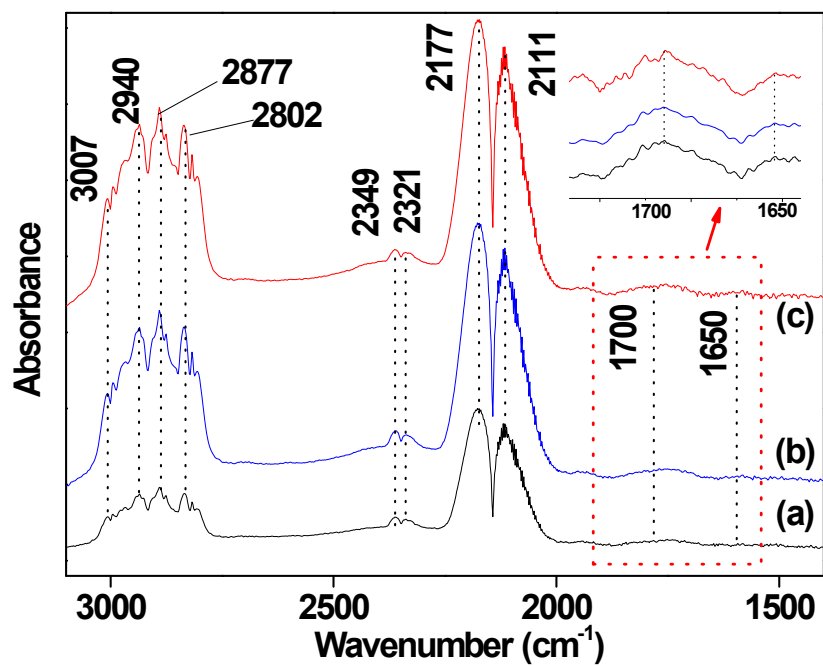

Fig. S9 In situ DRIFT spectra over HEU-12 zeolite after exposure to DME/CO/Ar for (a) 2 min, (b) 5 min and (c) 10 min at 240 °C.



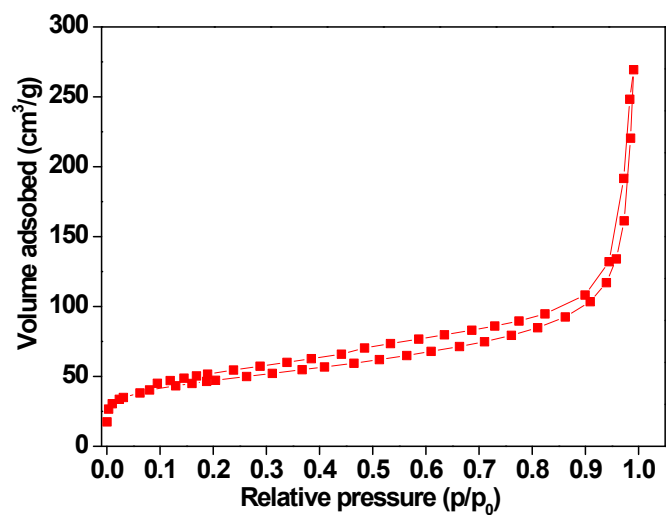

Fig. S10 Nitrogen adsorption-desorption isotherms of the spent HEU-12 zeolite after reaction for 50 h at 220 °C.

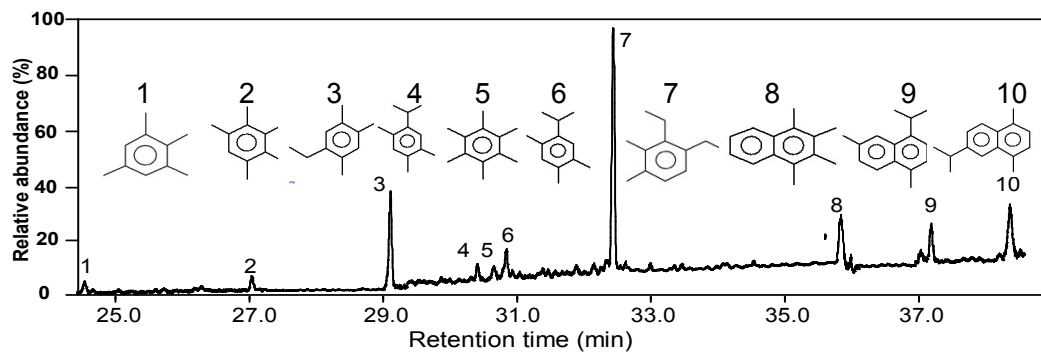

Fig. S11 GC-MS analysis of the soluble coke in spent EU-12 zeolite.

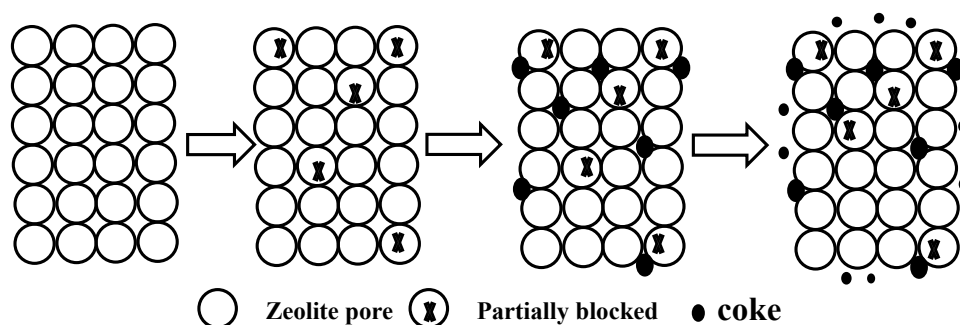

Scheme S1 A possible model of coke formation on HEU-12 zeolite during DME carbonylation.

For the life time test of EU-12 zeolite, during the period of 0-10 h, the DME conversion decreased from 15.7% to about 12%, maybe due to the activation period of zeolite. Along with the reaction, a relative stable catalyst activity was observed in 10-20 h. During this reaction period, possibly only few coke precursors formed in part of channels and on the external surface of EU-12 zeolite, thus a stable DME conversion was achieved. The zeolite activity declines suddenly at the junction between two periods of 10-20 h and 30-50 h, and then become stable for a long time. Here, the coke formed in 20-30 h period maybe depresses the diffusion of reactants and products, therefore declining the catalyst activity suddenly.

At the period of 30-50 h, HEU-12 exhibited a stable DME conversion. During this stage, possibly few coke precursor deposite on the external surface of the EU-12 zeolite. This means that the coke has no effect on the diffusion rate of the reactants and products, thus resulting in a stable DME conversion. When the coke accumulated into a certain size to depress the diffusion of reactants and products, the zeolite activity decreased suddenly and entered into another stable phase.

It should be noted that no obvious change in the product selectivity was observed during the evaluation process. We believed that the deactivation was only attributed to the diffusion pathways partially blocked by the formed coke instead of the active acidic sites covered or poisoned by the coke. Therefore, the active acidic sites still possess the ability to convert DME into MA and keep stable product selectivity.

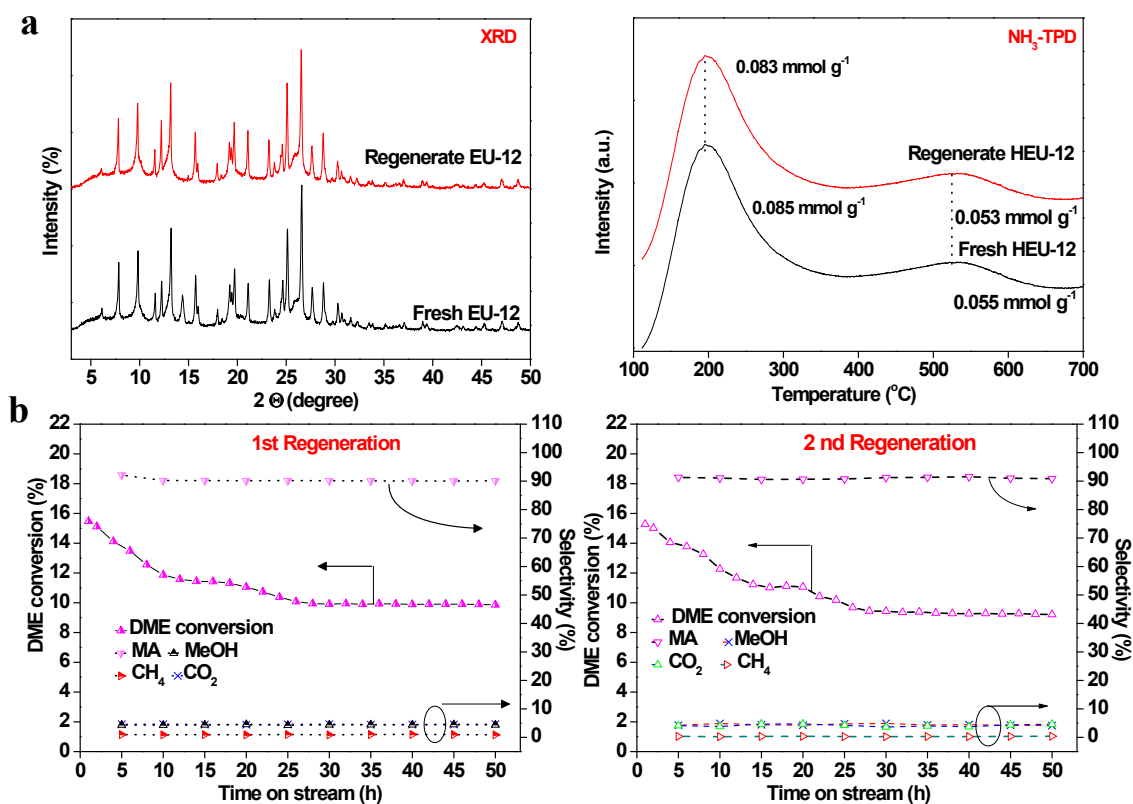

Fig. S12 (a) XRD patterns and NH<sub>3</sub>-TPD curves of fresh and regenerated HEU-12 zeolite; (b) DME carbonylation performance over regenerated HEU-12; reaction conditions: T=200 °C, P =1.5 MPa, feed gas: 3.03% Ar/ 4.13 DME/ 92.84% CO; flow rate= 20 mL/min, weight<sub>(zeolite)}</sub>=0.5 g.

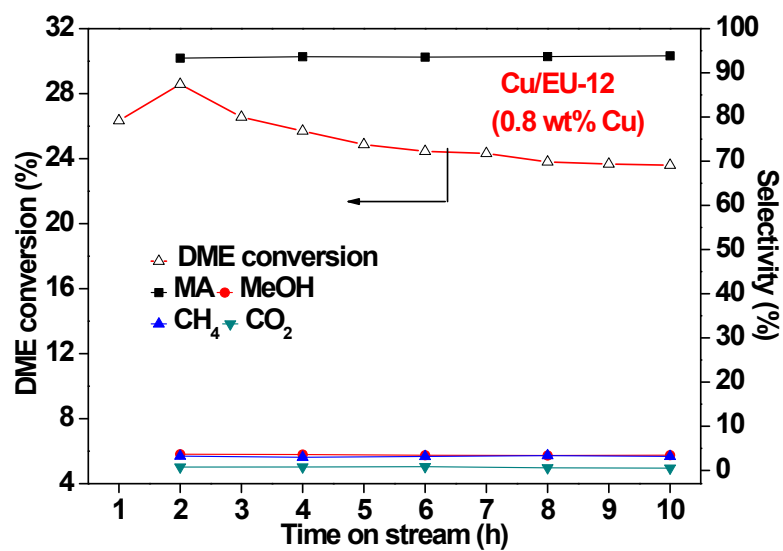

Fig. S13 The catalytic performance of DME carbonylation on Cu/EU-12 zeolite at 220 °C and 1.5 MPa. Reaction condition: feed gas: 3.03% Ar/ 4.13% DME/ 92.84% CO; flow rate = 20 mL/min, weight<sub>(zeolite)</sub>=0.5 g.

Table S1 Structural features and textural properties of HEU-12 and spent HEU-12 zeolite.

| Sample       | Si/Al | S <sub>BET</sub><br>(m <sup>2</sup> /g) | S <sub>ext</sub><br>(m <sup>2</sup> /g) | V <sub>total</sub><br>(cm <sup>3</sup> /g) | V <sub>micro</sub><br>(cm <sup>3</sup> /g) | Weak acidic sites <sup>a</sup><br>(mmol g <sup>-1</sup> ) | Strong acidic sites <sup>a</sup><br>(mmol g <sup>-1</sup> ) | Channel type <sup>b</sup>      | Channel size <sup>b</sup><br>(Å) |
|--------------|-------|-----------------------------------------|-----------------------------------------|--------------------------------------------|--------------------------------------------|-----------------------------------------------------------|-------------------------------------------------------------|--------------------------------|----------------------------------|
| HEU-12       | 8.3   | 330.2                                   | 80.9                                    | 0.588                                      | 0.494                                      | 0.085                                                     | 0.055                                                       | 3-D: 8-MR with side<br>pockets | 2.7×5.0<br>3.3×4.8<br>2.8×4.6    |
| Spent HEU-12 | —     | 309.5                                   | 64.4                                    | 0.574                                      | 0.472                                      | —                                                         | —                                                           | —                              | —                                |

<sup>a</sup> Estimation by NH<sub>3</sub>-TPD curve: weak and strong acidic sites are in the range of 100-400 °C and 400-650 °C, respectively.

<sup>b</sup> Structural data obtained from the International Zeolite Association, see: <http://www.iza-structure.org/databases/>.

## Reference

- [1] A. D. Lucas, P. Canizares, A. Duran and A. Carrero, *Appl. Catal. A: Gen.*, 1997, **156**, 299-317.
- [2] V. N. Shetti, J. Kim, R. Srivastava, M. Choi and R. Ryoo, *J. Catal.*, 2008, **254**, 296-303.
- [3] M. Guisnet and P. Magnoux; *Appl. Catal.*, 1989, **54**, 1-27.
- [4] O. Levenspi, *J. Catal.*, 1972, **25**, 265-272.
- [5] H.F. Xue, X.M. Huang, E. Ditzel, E.S. Zhang, M. Ma, W.J. Shen, *Ind. Eng. Chem. Res.*, 2013, **52**, 11510-11515.
- [6] Z.Z. Cheng, S.Y. Huang, Y. L. J. Lv, K. Cai, and X.B. Ma, *Ind. Eng. Chem. Res.*, 2017, **56**, 13618-13627.
- [7] H. Zhou, W.L. Zhu, L. Shi, H.C. Liu, S.P. Liu, Y.M. Ni, Y. Liu, Y.L. He, S.L. Xu, L.N. Li and Z.M. Liu, *J. Mol. Catal. A: Chem.*, 2016, **417**,

1-9.

[8] Y. L. S.Y. Huang, Z.Z. Cheng, S.P. Wang, Q.F. Ge and X.B. Ma, *J. Catal.*, 2018, **365**, 440-449.

[9] P. Cheung, A. Bhan, G.J. Sunley, D.J. Law and E. Iglesia, *J. Catal.*, 2007, **245**, 110-123.
